# Supplementary material
Source: PubMed Central journal article supplement (PMC3412944)

**TABLE S1.** Arithmetic mean normalized HI titers.

**TABLE S2.** Arithmetic mean normalized MN titers.

**TABLE S3.** Antigenic distance changes between mutant influenza viruses and their respective parent influenza viruses using microneutralization data.

| position <sup>a</sup> |        |     | Mutant <sup>b</sup> | Antigenic Distance<br>Change <sup>c</sup> | Position <sup>a</sup> |        |          | Mutant <sup>b</sup> | Antigenic Distance<br>Change <sup>c</sup> |
|-----------------------|--------|-----|---------------------|-------------------------------------------|-----------------------|--------|----------|---------------------|-------------------------------------------|
| H5                    | H3     | H1  |                     |                                           | H5                    | H3     | H1       |                     |                                           |
| 45                    | 54(C)  | 48  | 04-VNM-D45N         | 2.7781                                    | 140                   | 144(A) | 144      | 04-VNM-K140N        | 2.9008                                    |
|                       |        |     | 07-HKG-N45D         | 0.1475                                    | 141                   | 145(A) | 145(Ca2) | 04-VNM-S141F        | 2.9572                                    |
| 83                    | 91(E)  | 87  | 04-VNM-A83I         | 2.8002                                    |                       |        |          | 04-VNM-S141Y        | 3.0131                                    |
|                       |        |     | 05-MNG-I83A         | 2.4771                                    | 282                   | 285    | 286      | 04-VNM-M282I        | 2.1379                                    |
| 129                   | 133(A) | 133 | 04-VNM-L129S        | 3.0389                                    |                       |        |          | 05-MNG-I282M        | 2.3785                                    |

<sup>a</sup> The positions are numbered based on the amino-acid position in the HA of H5N1 HPAIV and corresponding positions in HA of H3N2 influenza A virus, respectively. All of these positions were predicted as antigenicity associated sites except for position 129; <sup>b</sup> The 6+2 mutants generated by using site-directed mutagenesis and reverse genetics were named according to HA/NA donor-mutation, 04-VNM denotes A/Vietnam/1203/04(H5N1), 05-MNG A/whooper swan/Mongolia/244/05(H5N1), and 07-HKG A/common magpie/Hong Kong/5052/07(H5N1); <sup>c</sup> These antigenic distances were measured by using antigenic cartography (<http://sysbio.cvm.msstate.edu/AntigenMap>)<sup>23, 24, 25</sup> using microneutralization (MN) data. One grid unit corresponds to a 2-fold change in the MN assay-measured titer.

## Legends for Supplementary Figure

**FIG. S1.** The antigenic cartography of H5N1 HPAIVs and their mutants (listed in TABLE 4) made by using AntigenMap (<http://sysbio.cvm.msstate.edu/AntigenMap>) (5, 6). The mutant positions were numbered based on the corresponding residue number in HA of H5N1 HPAIVs. Cartography based on the results from microneutralization assays. The parental viruses are labeled with heavily colored circles, and the mutants with lightly colored circles. The parental viruses are also encircled (circle = 2-unit diameter). A symbol (p) is appended after the name of each parent strain. One unit (grid) corresponds to a 2-fold change in the MN assay measured titer.





FIG. S1

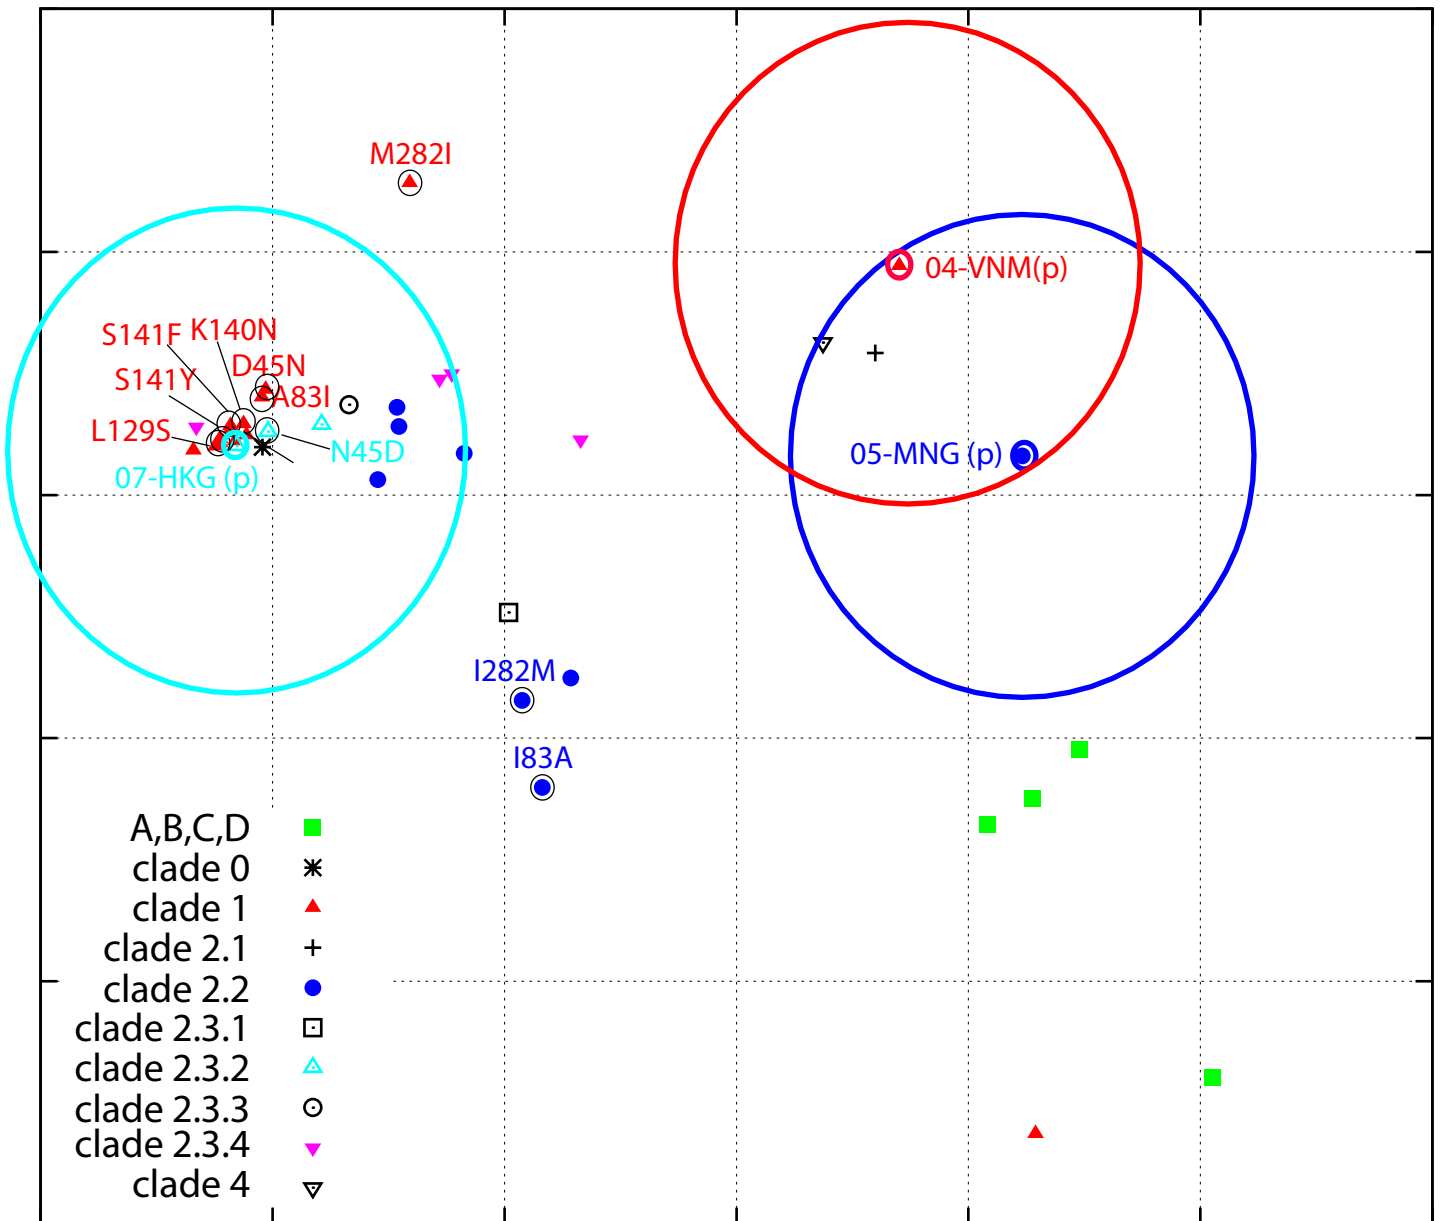

Supplement: NIHMS379204-supplement-01.pdf [file NIHMS379204-supplement-01.pdf]
